# Supplementary material
Source: MDPI journal article supplement (https://www.mdpi.com/1424-2818/12/5/189)
Supplement: s1 [file s1]

## Supplementary Material

Table S1. Results of the one-way PERMANOVA testing for differences in the concentration of biochemical compounds and composition (A), descriptors of nutritional quality (B) of organic matter in the sediment between sampling stations and seasons (df = degrees of freedom; MS = mean of squares; F = variance ratio; P = significance level; P(MC) = P Monte Carlo test; \*\*\* = P<0.001; \*\* = P< 0.01; \* = P< 0.05). Sampling stations: Og=Oglio, Po=Po, Go=Gorino, Gi=Giralda, De=Delta and Ce=Cesenatico. Sampling seasons: W=winter, S=summer.

|                  | Source           | Main test |      |       |     | Pair wise             |                       |                  |     |        |         |       |            |  |  |
|------------------|------------------|-----------|------|-------|-----|-----------------------|-----------------------|------------------|-----|--------|---------|-------|------------|--|--|
|                  |                  | df        | MS   | F     | P   | Sampling station      |                       | Sampling seasons |     |        |         |       |            |  |  |
|                  |                  |           |      |       |     | Summer                | Winter                | Oglio            | Po  | Gorino | Giralda | Delta | Cesenatico |  |  |
| A) Chlorophyll-a | Station          | 5         | 4.2  | 114.7 | *** | Gi>Go,Ce>D<br>e>Po>Og | Gi>Go,De>O<br>g,Po,Ce | W>S              | ns  | W>S    | W>S     | W>S   | ns         |  |  |
|                  | Season           | 1         | 6.1  | 166.5 | *** |                       |                       |                  |     |        |         |       |            |  |  |
|                  | Station x Season | 5         | 1.4  | 37.7  | *** |                       |                       |                  |     |        |         |       |            |  |  |
|                  | Residual         | 24        | 0.0  |       |     |                       |                       |                  |     |        |         |       |            |  |  |
| Pheaopigment     | Station          | 5         | 6.0  | 157.3 | *** | Gi,Go>Ce>D<br>e>Po>Og | Go>Gi>De>O<br>g,Ce>Po | W>S              | W>S | W>S    | ns      | W>S   | S>W        |  |  |
|                  | Season           | 1         | 1.1  | 29.9  | *** |                       |                       |                  |     |        |         |       |            |  |  |
|                  | Station x Season | 5         | 0.6  | 15.9  | *** |                       |                       |                  |     |        |         |       |            |  |  |
|                  | Residual         | 24        | 0.0  |       |     |                       |                       |                  |     |        |         |       |            |  |  |
| Total pigment    | Station          | 5         | 5.9  | 162.2 | *** | Gi>Go,Ce>D<br>e>Po>Og | Go>Gi>De>O<br>g,Ce>Po | W>S              | W>S | W>S    | ns      | W>S   | S>W        |  |  |
|                  | Season           | 1         | 1.5  | 41.5  | *** |                       |                       |                  |     |        |         |       |            |  |  |
|                  | Station x Season | 5         | 0.6  | 16.3  | *** |                       |                       |                  |     |        |         |       |            |  |  |
|                  | Residual         | 24        | 0.0  |       |     |                       |                       |                  |     |        |         |       |            |  |  |
| Protein          | Station          | 5         | 4.1  | 182.1 | *** | Go>Ce>Gi><br>De>Po>Og | Gi>Po,De,Ce,<br>Go>Og | W>S              | W>S | S>W    | W>S     | W>S   | S>W        |  |  |
|                  | Season           | 1         | 0.1  | 3.3   | ns  |                       |                       |                  |     |        |         |       |            |  |  |
|                  | Station x Season | 5         | 2.8  | 123.6 | *** |                       |                       |                  |     |        |         |       |            |  |  |
|                  | Residual         | 24        | 0.0  |       |     |                       |                       |                  |     |        |         |       |            |  |  |
| Carbohydrate     | Station          | 5         | 2.6  | 98.1  | *** | Gi>Go>Ce><br>Po,De>Og | Po,Go>Gi>O<br>g,De>Ce | W>S              | W>S | W>S    | W>S     | W>S   | S>W        |  |  |
|                  | Season           | 1         | 11.3 | 420.3 | *** |                       |                       |                  |     |        |         |       |            |  |  |
|                  | Station x Season | 5         | 2.0  | 73.9  | *** |                       |                       |                  |     |        |         |       |            |  |  |
|                  | Residual         | 24        | 0.0  |       |     |                       |                       |                  |     |        |         |       |            |  |  |
| Lipid            | Station          | 5         | 4.1  | 89.4  | *** | Go>Ce>Gi><br>Po,De>Og | Go>Gi,Po>O<br>g,De>Ce | W>S              | W>S | W>S    | W>S     | W>S   | S>W        |  |  |
|                  | Season           | 1         | 7.9  | 172.9 | *** |                       |                       |                  |     |        |         |       |            |  |  |
|                  | Station x Season | 5         | 1.1  | 24.8  | *** |                       |                       |                  |     |        |         |       |            |  |  |
|                  | Residual         | 24        | 0.0  |       |     |                       |                       |                  |     |        |         |       |            |  |  |
| Biopolymeric C   | Station          | 5         | 4.2  | 156.4 | *** | Go>Ce>Gi><br>De>Po>Og | Gi>Go,Po>D<br>e,Og>Ce | W>S              | W>S | S>W    | W>S     | W>S   | S>W        |  |  |
|                  | Season           | 1         | 2.1  | 78.0  | *** |                       |                       |                  |     |        |         |       |            |  |  |
|                  | Station x Season | 5         | 2.2  | 82.9  | *** |                       |                       |                  |     |        |         |       |            |  |  |

|    |                                    |                  |     |        |       |     |                   |                   |     |     |     |     |     |     |
|----|------------------------------------|------------------|-----|--------|-------|-----|-------------------|-------------------|-----|-----|-----|-----|-----|-----|
|    | Residual                           | 24               | 0.0 |        |       |     |                   |                   |     |     |     |     |     |     |
|    | Organic matter composition         | Station          | 5   | 21.0   | 123.8 | *** | Og≠Po≠Gi≠Go≠De≠Ce | Og≠Po≠Gi≠Go≠De≠Ce | S≠W | S≠W | S≠W | S≠W | S≠W | S≠W |
|    |                                    | Season           | 1   | 26.5   | 156.1 | *** |                   |                   |     |     |     |     |     |     |
|    |                                    | Station x Season | 5   | 7.9    | 46.5  | *** |                   |                   |     |     |     |     |     |     |
|    |                                    | Residual         | 24  | 0.2    |       |     |                   |                   |     |     |     |     |     |     |
| B) | Chlorophyll-a: biopolymeric C      | Station          | 5   | 28.4   | 147.8 | *** | Po>De>Gi>Ce,Go,Og | De,Gi>Go>Og,Ce>Po | ns  | S>W | W>S | W>S | W>S | ns  |
|    |                                    | Season           | 1   | 4.6    | 23.8  | *** |                   |                   |     |     |     |     |     |     |
|    |                                    | Station x Season | 5   | 23.6   | 122.7 | *** |                   |                   |     |     |     |     |     |     |
|    |                                    | Residual         | 24  | 0.2    |       |     |                   |                   |     |     |     |     |     |     |
|    | Protein: biopolymeric C            | Station          | 5   | 816.2  | 188.2 | *** | Go,Ce>De>Og,Po,Gi | Ce>Gi>De>Og,Po,Go | S>W | S>W | S>W | S>W | S>W | W>S |
|    |                                    | Season           | 1   | 2287.9 | 527.5 | *** |                   |                   |     |     |     |     |     |     |
|    |                                    | Station x Season | 5   | 446.5  | 103.0 | *** |                   |                   |     |     |     |     |     |     |
|    |                                    | Residual         | 24  | 4.3    |       |     |                   |                   |     |     |     |     |     |     |
|    | Protein: carbohydrate              | Station          | 5   | 0.3    | 182.9 | *** | Go,Ce>Gi>De>Og,Po | Ce>Gi>De>Og,Po>Go | S>W | S>W | S>W | S>W | S>W | W>S |
|    |                                    | Season           | 1   | 1.0    | 515.6 | *** |                   |                   |     |     |     |     |     |     |
|    |                                    | Station x Season | 5   | 0.2    | 100.3 | *** |                   |                   |     |     |     |     |     |     |
|    |                                    | Residual         | 24  | 0.0    |       |     |                   |                   |     |     |     |     |     |     |
|    | Organic matter nutritional quality | Station          | 5   | 845.0  | 186.5 | *** | Og≠Po≠Gi≠De≠Go,Ce | Og,Po≠Gi≠Go≠De≠Ce | S≠W | S≠W | S≠W | S≠W | S≠W | S≠W |
|    |                                    | Season           | 1   | 2293.4 | 506.1 | *** |                   |                   |     |     |     |     |     |     |
|    |                                    | Station x Season | 5   | 470.3  | 103.8 | *** |                   |                   |     |     |     |     |     |     |
|    |                                    | Residual         | 24  | 4.5    |       |     |                   |                   |     |     |     |     |     |     |
| C) | Aminopeptidase                     | Station          | 5   | 2.6    | 5.6   | **  | Gi>Po,Ce,Og,Go>De | Gi,Go>De,Og>Ce>Po | ns  | S>W | ns  | ns  | ns  | S>W |
|    |                                    | Season           | 1   | 0.1    | 0.2   | ns  |                   |                   |     |     |     |     |     |     |
|    |                                    | Station x Season | 5   | 2.2    | 4.7   | **  |                   |                   |     |     |     |     |     |     |
|    |                                    | Residual         | 24  | 0.5    |       |     |                   |                   |     |     |     |     |     |     |
|    | β-glucosidase                      | Station          | 5   | 2.6    | 19.5  | *** | Gi>Ce,Po>Go>De,Og | De,Po,Og>Gi>Go>Ce | W>S | W>S | ns  | ns  | W>S | S>W |
|    |                                    | Season           | 1   | 5.4    | 39.7  | *** |                   |                   |     |     |     |     |     |     |
|    |                                    | Station x Season | 5   | 2.6    | 19.5  | *** |                   |                   |     |     |     |     |     |     |
|    |                                    | Residual         | 24  | 0.1    |       |     |                   |                   |     |     |     |     |     |     |
|    | Alkaline phosphatase               | Station          | 4   | 3.7    | 26.8  | *** | Gi>Ce,Po>Go>De,Og | Gi>Go>De,Ce,Og,Po | W>S | S>W | ns  | S>W | W>S | S>W |
|    |                                    | Season           | 1   | 0.2    | 1.3   | ns  |                   |                   |     |     |     |     |     |     |
|    |                                    | Station x Season | 3   | 2.3    | 17.0  | *** |                   |                   |     |     |     |     |     |     |
|    |                                    | Residual         | 18  | 0.1    |       |     |                   |                   |     |     |     |     |     |     |

Table S2. Results of multivariate PERMANOVA and pair wise test on prokaryotic (A) and meiofaunal (B) abundance, biomass, richness of meiofaunal taxa and taxonomic composition in the sediment among stations and sampling seasons (df = degrees of freedom; MF = mean of squares; F = variance ratio; P = significance level; \*\*\* = P<0.001; \*\* = P<0.01; \* = P<0.05; ns = not significant). Sampling stations: Og=Oglio, Po=Po, Go=Gorino, Gi=Giralda, De=Delta and Ce=Cesenatico. Sampling seasons: W=winter, S=summer.

|                                  | Source                       | Main test        |         |         |        | Pair wise         |                   |                   |     |        |         |       |            |     |
|----------------------------------|------------------------------|------------------|---------|---------|--------|-------------------|-------------------|-------------------|-----|--------|---------|-------|------------|-----|
|                                  |                              | df               | MS      | F       | P      | Sampling station  |                   | Oglio             | Po  | Gorino | Giralda | Delta | Cesenatico |     |
|                                  |                              |                  |         |         |        | Summer            | Winter            |                   |     |        |         |       |            |     |
| A)                               | Prokaryotic abundance        | Sampling station | 5       | 6435.9  | 75.5   | ***               | Go>Gi,Ce>De>Po>Og | Go>Gi,Ce>De,Po>Og | W>S | W>S    | W>S     | W>S   | ns         | S>W |
|                                  |                              | Season           | 1       | 795.6   | 9.3    | ***               |                   |                   |     |        |         |       |            |     |
|                                  |                              | Station x Season | 5       | 1029.4  | 12.1   | ***               |                   |                   |     |        |         |       |            |     |
|                                  |                              | Residual         | 24      | 85.3    |        |                   |                   |                   |     |        |         |       |            |     |
|                                  | Prokaryotic biomass          | Sampling station | 5       | 6410.3  | 75.5   | ***               | Go>Gi,Ce>De>Po>Og | Go>Gi>Po,De,Ce>Og | W>S | W>S    | W>S     | W>S   | ns         | S>W |
|                                  |                              | Season           | 1       | 778.7   | 9.2    | ***               |                   |                   |     |        |         |       |            |     |
|                                  |                              | Station x Season | 5       | 999.3   | 11.8   | ***               |                   |                   |     |        |         |       |            |     |
|                                  |                              | Residual         | 24      | 84.9    |        |                   |                   |                   |     |        |         |       |            |     |
|                                  | Prokaryotic OTUs composition | Sampling station | 4       | 4616.2  | 1313.0 | ***               | Og#Po#Go#Gi#De#Ce | Og#Po#Go#Gi#De#Ce | S#W | S#W    | S#W     | S#W   | S#W        | S#W |
|                                  |                              | Season           | 1       | 5572.2  | 1584.9 | ***               |                   |                   |     |        |         |       |            |     |
|                                  |                              | Station x Season | 4       | 4085.7  | 1162.1 | ***               |                   |                   |     |        |         |       |            |     |
|                                  |                              | Residual         | 10      | 3.5     |        |                   |                   |                   |     |        |         |       |            |     |
| B)                               | Meiofaunal abundance         | Sampling station | 5       | 13231.0 | 51.0   | ***               | Gi>De>Go>Po,Ce>Og | Go,Gi>De>Ce>Po,Og | ns  | S>W    | W>S     | ns    | S>W        | W>S |
|                                  |                              | Season           | 1       | 723.0   | 2.8    | ns                |                   |                   |     |        |         |       |            |     |
|                                  |                              | Station x Season | 5       | 2707.7  | 10.4   | ***               |                   |                   |     |        |         |       |            |     |
|                                  |                              | Residual         | 24      | 259.3   |        |                   |                   |                   |     |        |         |       |            |     |
|                                  | Meiofaunal biomass           | Sampling station | 5       | 12071.0 | 34.1   | ***               | Gi>De>Go>Po,Ce>Og | Go,Gi>Ce>De>Po,Og | ns  | ns     | ns      | ns    | S>W        | W>S |
|                                  |                              | Season           | 1       | 629.9   | 1.8    | ns                |                   |                   |     |        |         |       |            |     |
|                                  |                              | Station x Season | 5       | 3741.6  | 10.6   | ***               |                   |                   |     |        |         |       |            |     |
|                                  |                              | Residual         | 24      | 353.8   |        |                   |                   |                   |     |        |         |       |            |     |
|                                  | Richness of meiofaunal taxa  | Sampling station | 5       | 260.5   | 0.9    | ns                | ns                | ns                | ns  | ns     | ns      | ns    | ns         | ns  |
|                                  |                              | Season           | 1       | 330.2   | 1.2    | ns                |                   |                   |     |        |         |       |            |     |
|                                  |                              | Station x Season | 5       | 411.6   | 1.5    | ns                |                   |                   |     |        |         |       |            |     |
|                                  |                              | Residual         | 24      | 280.5   |        |                   |                   |                   |     |        |         |       |            |     |
| Meiofaunal taxonomic composition | Sampling station             | 5                | 13773.0 | 41.5    | ***    | Og,Po#Go#Gi#De#Ce | De#Og,Po#Go,Gi#Ce | ns                | S#W | S#W    | ns      | S#W   | S#W        |     |
|                                  | Season                       | 1                | 893.0   | 2.7     | ns     |                   |                   |                   |     |        |         |       |            |     |
|                                  | Station x Season             | 5                | 2780.9  | 8.4     | ***    |                   |                   |                   |     |        |         |       |            |     |
|                                  | Residual                     | 24               | 332.2   |         |        |                   |                   |                   |     |        |         |       |            |     |
